# Supplementary material
Source: publisher figshare collection journal article supplement (https://sage.figshare.com/ndownloader/files/13380647)
Supplement: Supplementary file 1 [file 13380647]

# Twenty Years of Digital Media Effects on Civic and Political Participation

## Supplemental Materials

Shelley Boulianne

---

### Supplemental Methods

#### Supplemental search strategy description

The studies were originally compiled using searches of academic databases and Google Scholar using a combination of keywords to measure digital media use as well as participation in civic and political engagement (Table 1). Specially, the following databases were used to run queries based on the keywords listed in Table 1: EBSCO: Academic Search Complete, International Political Science Abstracts, Political Science Complete, SocINDEX, and Communication & Mass Media Complete, Proquest (includes Sociological Abstracts and PAIS), JSTOR, and finally, Scopus, Web of Science, and Google Scholar.

Table A1

*Social Sciences Citation Index number of hits*

|                           | Civic engagement | Civic participation | Political engagement | Political participation |
|---------------------------|------------------|---------------------|----------------------|-------------------------|
| Internet                  | 367              | 336                 | 484                  | 830                     |
| Web                       | 79               | 74                  | 134                  | 232                     |
| “Digital media”           | 35               | 32                  | 59                   | 68                      |
| Online                    | 287              | 279                 | 426                  | 751                     |
| Blog                      | 11               | 7                   | 20                   | 33                      |
| “social media”            | 175              | 152                 | 271                  | 376                     |
| “social networking sites” | 30               | 26                  | 32                   | 50                      |
| Facebook                  | 84               | 79                  | 129                  | 169                     |
| Twitter                   | 32               | 32                  | 80                   | 112                     |

Google Scholar was used to identify unpublished materials, such as conference papers, as well as books. Omitting books would be a detrimental flaw given the research questions for this

meta-analysis paper. Many relevant pieces were found in edited volumes highlighting a specific region. For example, using Google Scholar, we found chapters from an edited volume on Brazil (see Breuer and Groshek, 2014 in Breuer and Welp, 2014), as well as an edited volume on Asia (see Chan, Lee, and Chen, 2016 in Wei, 2016). Furthermore, the edited book by Anduiza, Jensen and Jorba (2012), titled *Digital media and political engagement worldwide*, proved helpful. There are relevant chapters covering research in the United States, Germany, and Spain. If a conference paper or theses/dissertation and a published version of this work were both available, the published version was retained in the database, replicating an approach used by Yang and Shen (2017). For conference papers, we contacted authors to seek permission to use their presentation in our analysis. In most cases, authors sent us a published version of their paper to cite.

### **Supplemental analysis description**

As one last note, the use of the term “effect” borrows from meta-analysis literature (e.g., Ellis, 2010). Most the studies are based on cross-sectional surveys, which can only assess correlation not causation. However, 26 of the studies included longitudinal analysis, such as surveys of the same respondents across time (e.g., Emmer, Wolling, & Vowe, 2012). Most of the longitudinal studies were conducted in the same calendar year and were coded as such (e.g., Boulianne, 2011; Towner, 2013). In the case of multiple years of data collection, the most contemporary year was coded as the year of data collection. This same practice was used for pooled data (e.g., Shah, McLeod & Yoon, 2001).

Furthermore, the meta-analysis scholarship offers a variety of ways to adjust for publication bias, weight effects based on sample sizes, and other transformations of the original coefficients reported in published papers (see Rains et al., 2018). We do not complete any manipulations of the coefficients for several reasons. First, the most common practice is to report

on standardized regression coefficients and we wanted to replicate the original estimates to maintain reliability and transparency in methodology. Two, we argue that the adjustments based on sample size are not appropriate – the core issue should be about randomness of the sample, after that, representativeness should be considered. The methodological reporting practices for most studies do not allow an assessment for these principles. Furthermore, sample size matters less once a certain threshold has been met. The smallest sample size was 109 (valid sample size from the table of analysis of Pew data, see Hoffman, 2012) and the largest was 50,268 (a study using the European Social Survey, see Geber, Scherer, & Hefner, 2016). Finally, recently published meta-analysis studies offer different effect estimates, after adjustments for sample size and other factors, such as publication bias. For example, Matthes et al. (2018) offer several estimations, but they end up with the same calculated effect ( $r = .10$ ). As such, the adjustments may not be necessary.

## Reference List

- Al-Kandari, A., & Hasanen, M. (2012). The impact of the internet on political attitudes in Kuwait and Egypt. *Telematics and Informatics*, 29, 245-253.  
doi:10.1016/j.tele.2011.10.005
- Ardèvol-Abreu, A., Hooker, C., & Gil de Zuniga, H. (2017). Online news creation, trust in the media, and political participation: Direct and moderating effects over time. *Journalism*, Online first, 1-21. doi: 10.1177/1464884917700447
- Atkinson, L. (2015). Buying in or tuning out: The role of consumption in politically active young adults. In H. Gil de Zuniga (Ed.), *New technologies and civic engagement: New agendas in communication* (pp. 23-45). London: Routledge.
- Bachmann, I., & de Zuniga, Homero Gil. (2013). News platform preference as a predictor of political and civic participation. *Convergence - The International Journal of Research into New Media Technologies*, 19, 496-512.
- Baek, Kang Hui (2015). *Physical place matters in digital activism: Investigating the roles of local and global social capital, community, and social networking sites in the occupy movement*. (Doctoral dissertation, University of Texas). Retrieved October 3, 2016 from <https://repositories.lib.utexas.edu/handle/2152/31471>.
- Bakker, T. P., & de Vreese, C. H. (2011). Good news for the future? Young people, internet use, and political participation. *Communication Research*, 38, 451-470.  
doi:10.1177/0093650210381738
- Barnidge, M. (2015). The role of news in promoting political disagreement on social media. *Computers in Human Behavior*, 52, 211-218. doi:10.1016/j.chb.2015.06.011
- Baumgartner, J. C., & Morris, J. S. (2010). MyFaceTube politics social networking web sites and

- political engagement of young adults. *Social Science Computer Review*, 28, 24-44.  
doi:10.1177/0894439309334325
- Bimber, B., Cantijoch, M., Copeland, L., & Gibson, R. (2015). Digital media and political participation: The moderating role of political interest across acts and over time. *Social Science Computer Review*, 33, 21-42. doi:10.1177/0894439314526559
- Boberiene, L. (2013). Digital worlds and civic opportunities: Connecting online and offline activism in Lithuania. *Media Transformations*, 10, 14-39. Retrieved from <https://e1ta1pykla.vdu.lt/handle/1/31448>
- Bode, L. (2012). Facebooking it to the polls: A study in online social networking and political behavior. *Journal of Information Technology & Politics*, 9, 352–369.  
doi:10.1080/19331681.2012.709045
- Bode, L. (2017a). Closing the gap: Gender parity in political engagement on social media. *Information Communication & Society*, 20, 587-603.  
doi:10.1080/1369118X.2016.1202302
- Bode, L. (2017b) Feeling the pressure: Attitudes about volunteering and their effect on civic and political behaviors. *Journal of Adolescence*, 57, 23-30.
- Bode, L., & Dalrymple, K. E. (2016). Politics in 140 characters or less: Campaign communication, network interaction, and political participation on Twitter. *Journal of Political Marketing*, 15, 311-332. doi:10.1080/15377857.2014.959686
- Bode, L., Vraga, E. K., Borah, P., & Shah, D. V. (2014). A new space for political behavior: Political social networking and its democratic consequences. *Journal of Computer-Mediated Communication*, 19, 414-429. doi:10.1111/jcc4.12048

- Boulianne, S. (2007). *Connecting, informing, and mobilizing youth and the advantaged: The role of the Internet in political engagement*. (Dissertation), University of Wisconsin-Madison, Madison, Wisconsin.
- Boulianne, S. (2011). Stimulating or reinforcing political interest: Using panel data to examine reciprocal effects between news media and political interest. *Political Communication*, 28, 147-162. doi:10.1080/10584609.2010.540305
- Boulianne, S. (2016). Online news, civic awareness, and engagement in civic and political life. *New Media & Society*, 18, 1840-1856. doi:10.1177/1461444815616222
- Boulianne, S. (Forthcoming). Transforming the disengaged: Social media and youth in Canada. In Mireille Lalancette, Vincent Raynald, and Erin Crandall (Eds). *What's #trending in Canadian politics? Understanding transformations in power, media, and the public sphere*. UBC Press.
- Breuer, A., & Groshek, J. (2014a). Online media and offline empowerment in post-rebellion Tunisia: An analysis of internet use during democratic transition. *Journal of Information Technology & Politics*, 11, 25-44. doi:10.1080/19331681.2013.850464
- Brundidge, J. (2010). Political discussion and news use in the contemporary public sphere: The "accessibility" and "traversability" of the internet. *Journal of the Public*, 17, 63-81.
- Brundidge, J., Garrett, R. K., Rojas, H., & Gil de Zuniga, H. (2014). Political participation and ideological news online: "Differential gains" and "differential losses" in a presidential election cycle. *Mass Communication and Society*, 17, 464-486. doi:10.1080/15205436.2013.821492
- Brusilovskiy, E., Townley, G., Snethen, G., & Salzer, M. S. (2016). Social media use, community participation and psychological well-being among individuals with serious

mental illnesses. *Computers in Human Behavior*, 65, 232-240.

doi:10.1016/j.chb.2016.08.036

Burean, T., & Badescu, G. (2014). Voices of discontent: Student protest participation in Romania. *Communist and Post-Communist Studies*, 47, 385-397.

doi:10.1016/j.postcomstud.2014.10.004

Calenda, D., & Meijer, A. (2009). Young people, the internet and political participation: Findings of a web survey in Italy, Spain and The Netherlands. *Information Communication & Society*, 12, 879-898. doi:10.1080/13691180802158508

Cantijoch, M., Cutts, D., & Gibson, R. (2011, September). *Internet use and political engagement: The role of e-campaigning as a pathway to political participation*. Paper presented at the Elections, Public Opinion and Parties (EPOP) Conference, Oxford. Retrieved from [http://paperroom.ipsa.org/papers/paper\\_17348.pdf](http://paperroom.ipsa.org/papers/paper_17348.pdf)

Casteltrione, I. (2016). Facebook and political participation: Virtuous circle and participation intermediaries. *Interactions: Studies in Communication & Culture*, 7, 177-196. doi: 10.1386/iscc.7.2.177\_1

Chadha, M., Avila, A., & Gil de Zúñiga, H. (2012). Listening in: Building a profile of podcast users and analyzing their political participation. *Journal of Information Technology & Politics*, 9, 388-401. doi:10.1080/19331681.2012.717481

Chan, M. (2014). Exploring the contingent effects of political efficacy and partisan strength on the relationship between online news use and democratic engagement. *International Journal of Communication*, 8, 1195-1215. <http://ijoc.org/index.php/ijoc/article/view/2559/1128>

- Chan, M. (2016). Social network sites and political engagement: Exploring the impact of Facebook connections and uses on political protest and participation. *Mass Communication and Society*, 19, 430-451. doi:10.1080/15205436.2016.1161803
- Chan, M., Chen, H., & Lee, F. L. F. (2016). Examining the roles of mobile and social media in political participation: A cross-national analysis of three Asian societies using a communication mediation approach. *New Media & Society, Online First*. doi:10.1177/1461444816653190
- Chan, M., & Guo, J. (2013). The role of political efficacy on the relationship between Facebook use and participatory behaviors: A comparative study of young American and Chinese adults. *Cyberpsychology, Behavior, and Social Networking*, 16, 460-463. doi:10.1089/cyber.2012.0468
- Chan, M., & Lee, F. L. F. (2014). Selective exposure and agenda setting: exploring the impact of partisan media exposure on agenda diversity and political participation. *Asian Journal of Communication*, 24, 301-314. doi:10.1080/01292986.2014.903424
- Chan, M., Lee, F. L. F., & Chen, H. (2016). Exploring the potential for mobile communications to engender an engaged citizenry: A comparative study of university students in China, Hong Kong and Taiwan. In R. Wei (ed.), *Mobile media, political participation, and civic activism in Asia*. (pp. 193-213). Netherlands: Springer.
- Chan, J., Chung, R., & Lee, L. F. (2004, May). *Mobilizing social capital: Internet's role in a historic rally in Hong Kong*. Paper presented at the International Communication Association Annual Meeting, New Orleans, USA. Retrieved from [http://citation.allacademic.com/meta/p\\_mla\\_apa\\_research\\_citation/1/1/2/5/0/p112504\\_in dex.html](http://citation.allacademic.com/meta/p_mla_apa_research_citation/1/1/2/5/0/p112504_in dex.html)



- Chen, K. Y. N., & Lo, V. H. (2010). Media use and political capital in northern and southern Taiwan. *Issues & Studies*, 46, 187-225.
- Chen, H. T., Chan, M., & Lee, F. L. F. (2016). Social media use and democratic engagement: a comparative study of Hong Kong, Taiwan, and China. *Chinese Journal of Communication*, 9, 348-366. doi: 10.1080/17544750.2016.1210182
- Chen, Z., & Chan, M. (2017). Motivations for social media use and impact on political participation in China: A cognitive and communication mediation approach. *Cyberpsychology, Behavior, and Social Networking*, 20, 83-90. doi: 10.1089/cyber.2016.0174
- Cheng, Y., Liang, J. W., & Leung, L. (2015). Social network service use on mobile devices: An examination of gratifications, civic attitudes and civic engagement in China. *New Media & Society*, 17, 1096-1116. doi:10.1177/1461444814521362
- Cho, J., & Keum, H. (2016). Leveling or tilting the playing field: Social networking sites and offline political communication inequality. *Social Science Journal*, 53, 236-246. doi:10.1016/j.soscij.2016.01.002
- Choi, D. H., & Shin, D. H. (2017). A dialectic perspective on the interactive relationship between social media and civic participation: The moderating role of social capital. *Information Communication & Society*, 20, 151-166. doi:10.1080/1369118X.2016.1154586
- Choi, J., Lee, J. K., & Metzgar, E.T. (2017). Investigating effects of social media news sharing on the relationship between network heterogeneity and political participation. *Computers in Human Behavior*, 27, 25-31. doi: 10.1016/j.chb.2017.05.003
- Choi, J. (2016). Differential use, differential effects: Investigating the roles of different modes of

- news use in promoting political participation. *Journal of Computer-Mediated Communication*, 21, 436-450. doi:10.1111/jcc4.12176
- Cicognani, E., Zani, B., Fournier, B., Gavray, C., & Born, M. (2012). Gender differences in youths' political engagement and participation: The role of parents and of adolescents' social and civic participation. *Journal of Adolescence*, 35, 561-576. doi:10.1016/j.adolescence.2011.10.002
- Conroy, M., Feezell, J. T., & Guerrero, M. (2012). Facebook and political engagement: A study of online political group membership and offline political engagement. *Computers in Human Behavior*, 28, 1535–1546. doi:10.1016/j.chb.2012.03.012
- Copeland, L., & Bimber, B. (2015). Variation in the relationship between digital media use and political participation in U.S. elections over time, 1996–2012: Does Obama's re-election change the picture? *Journal of Information Technology & Politics*, 12, 74–87.
- Curtice, J., & Norris, P. (2007). Isolates or Socialites? The social ties of internet users. In A. Park., John Curtice, Katarina Thomson, Miranda Phillips & Mark Johnson (Eds.) *British social attitudes: The 23<sup>rd</sup> report perspectives on a changing society* (pp 239-259). London: Sage. doi: 10.4135/9781849208680.n10
- Dimitrova, D. V., Shehata, A., Strömbäck, J., & Nord, L. W. (2014). The effects of digital media on political knowledge and participation in election campaigns: Evidence from panel data. *Communication Research*, 41, 95-118. doi:10.1177/0093650211426004
- Droguett, A. P. G. (2012). *The relationship between Chilean youths' political usage of Facebook and their participation in traditional and nontraditional offline politics*. (Master's thesis). Retrieved May 3, 2016 from <http://www.scriptsionline.uba.uva.nl/document/355869>

- Earl, J., Copeland, L., & Bimber, B. (2017). Routing around organizations: Self-directed political consumption. *Mobilization*, 22, 131-153. doi: 10.17813/1086-671x-22-2-131
- Ekström, M., Olsson, T., & Shehata, A. (2014). Spaces for public orientation? Longitudinal effects of internet use in adolescence. *Information, Communication & Society*, 17, 168–183. doi:10.1080/1369118X.2013.862288
- Ekström, M., & Ostman, J. (2015). Information, interaction, and creative production: The effects of three forms of internet use on youth democratic engagement. *Communication Research*, 42, 796-818. doi:10.1177/0093650213476295
- Emmer, M., Wolling, J., & Vowe, G. (2012). Changing political communication in Germany: Findings from a longitudinal study on the influence of the internet on political information, discussion and the participation of citizens. *Communications-European Journal of Communication Research*, 37, 233-252. doi:10.1515/commun-2012-0013
- Geber, S., Scherer, H., & Hefner, D. (2016). Social capital in media societies: The impact of media use and media structures on social capital. *International Communication Gazette*, 78, 493-513. doi: 10.1177/1748048516640211
- Gibson, R., Howard, P. E. N., & Ward, S. (2000). *Social capital, Internet connectedness & political participation: A four-country study*. Paper presented at the 2000 International Political Science Association, Quebec, Canada.
- Gil de Zúñiga, H., Bachmann, I., Shih-Hsien, H., & Brundidge, J. (2013). Expressive versus consumptive blog use: Implications for interpersonal discussion and political participation. *International Journal of Communication*, 7, 1538-1559. Retrieved from <http://ijoc.org/index.php/ijoc/article/view/2215/949>.

- Gil de Zúñiga, H., Copeland, L., & Bimber, B. (2013). Political consumerism: Civic engagement and the social media connection. *New Media & Society*, 16, 488-506.  
doi:10.1177/1461444813487960
- Gil de Zúñiga, H., Jung, N., & Valenzuela, S. (2012). Social media use for news and individuals' social capital, civic engagement and political participation. *Journal of Computer-Mediated Communication*, 17, 319–336. doi:10.1111/j.1083-6101.2012.01574.x
- Gil de Zúñiga, H., Puig-i-Abril, E., & Rojas, H. (2009). Weblogs, traditional sources online and political participation: An assessment of how the internet is changing the political environment. *New Media & Society*, 11, 553-574. doi:10.1177/1461444809102960
- Gil de Zúñiga, H., Molyneux, L., & Zheng, P. (2014). Social media, political expression, and political participation: Panel analysis of lagged and concurrent relationships. *Journal of Communication*, 64, 612-634. doi:10.1111/jcom.12103
- Gil de Zúñiga, H., & Valenzuela, S. (2011). The mediating path to a stronger citizenship: Online and offline networks, weak ties, and civic engagement. *Communication Research*, 38, 397-421. doi:10.1177/0093650210384984
- Gil de Zúñiga, H., Veenstra, A., Vraga, E., & Shah, D. (2010). Digital democracy: Reimagining pathways to political participation. *Journal of Information Technology & Politics*, 7, 36-51. doi:10.1080/19331680903316742
- Gil de Zúñiga, H., Weeks, B., & Ardèvol-Abreu, A. (2017). Effects of the news-finds-me perception in communication: Social media use implications for news seeking and learning about politics. *Journal of Computer-Mediated Communication*, 22, 105-123. doi:10.1111/jcc4.12185

Goldberg, R. M. (2011). *Broadband use and civic engagement*. (Master's thesis). Retrieved October 3, 2016 from

<https://repository.library.georgetown.edu/bitstream/handle/10822/553737/goldbergRafi.pdf?sequence=1>

Gotlieb, M. R., & Cheema, S. E. (2017). From consumer to producer: motivations, internet use, and political consumerism. *Information Communication & Society*, 20, 570-586. doi:10.1080/1369118x.2016.1202301

Gotlieb, M. R., Kyoung, K., Gabay, I., Riddle, K., & Shah, D. V. (2015). Socialization of lifestyle and conventional politics among early and late adolescents. *Journal of Applied Developmental Psychology*, 41, 60-70. doi:10.1016/j.appdev.2015.06.004

Gotlieb, M. R., & Thorson, K. (2017). Connected political consumers: transforming personalized politics among youth into broader repertoires of action. *Journal of Youth Studies*, 20, 1044-1061. doi: 10.1080/13676261.2017.1305101

Gregory, R. (2016). Sex and political participation on Facebook (Dissertation, University of Northern Iowa). Retrieved October 25, 2017 from [https://scholarworks.uni.edu/cgi/viewcontent.cgi?referer=http://www.google.com/url?sa=t&rct=j&q=&esrc=s&source=web&cd=1&ved=0ahUKEwiKt6u1iZzaAhUI3lQKHdiuCx4QFggnMAA&url=http%3A%2F%2Fscholarworks.uni.edu%2Fcgi%2Fviewcontent.cgi%3Farticle%3D1310%26context%3Detd&usg=AOvVaw10\\_jje\\_tcszRnKnzTDjG8w&httpsredir=1&article=1310&context=etd](https://scholarworks.uni.edu/cgi/viewcontent.cgi?referer=http://www.google.com/url?sa=t&rct=j&q=&esrc=s&source=web&cd=1&ved=0ahUKEwiKt6u1iZzaAhUI3lQKHdiuCx4QFggnMAA&url=http%3A%2F%2Fscholarworks.uni.edu%2Fcgi%2Fviewcontent.cgi%3Farticle%3D1310%26context%3Detd&usg=AOvVaw10_jje_tcszRnKnzTDjG8w&httpsredir=1&article=1310&context=etd)

Groshek, J., & Krongard, S. (2016). Netflix and engage? Implications for streaming television on political participation during the 2016 US presidential campaign. *Social Science*, 5, 1-18. doi: 10.3390/socsci5040065

- Gust, L. V. (2012). *A new civics in the digital age: Connecting online and offline activism in Lithuania*. (Dissertation, Clemson University). Retrieved from [https://tigerprints.clemson.edu/cgi/viewcontent.cgi?article=1987&context=all\\_dissertations](https://tigerprints.clemson.edu/cgi/viewcontent.cgi?article=1987&context=all_dissertations)
- Halpern, D. (2013). *Towards a networked public sphere: How social media triggers civic engagement through news consumption and political discussion*. (Dissertation, Rutgers University). Retrieved from <https://rucore.libraries.rutgers.edu/rutgers-lib/40584/PDF/1/play/>
- Halpern, D., & Lee, S. K. (2011). *Civic participation and social media: Are they bowling together?* Paper presented at the American Political Science Association, Seattle, Washington. Retrieved June 17, 2016 from [https://papers.ssrn.com/sol3/papers2.cfm?abstract\\_id=1901898](https://papers.ssrn.com/sol3/papers2.cfm?abstract_id=1901898)
- Halpern, D., Valenzuela, S., & Katz, J. E. (2017). We face, I tweet: How different social media influence political participation through collective and internal efficacy. *Journal of Computer-Mediated Communication*, 22, 320-336. doi: 10.1111/jcc4.12198
- Hampton, K. N., Lee, C. J., & Her, E. J. (2011). How new media affords network diversity: Direct and mediated access to social capital through participation in local social settings. *New Media & Society*, 13, 1031-1049. doi:10.1177/1461444810390342
- Hao, X. M., Wen, N. N., & George, C. (2014). News consumption and political and civic engagement among young people. *Journal of Youth Studies*, 17, 1221-1238. doi:10.1080/13676261.2014.901490
- Hardy, B. W., & Scheufele, D. A. (2005). Examining differential gains from internet use: Comparing the moderating role of talk and online interactions. *Journal of Communication*, 55, 71-84. doi:10.1093/joc/55.1.71

- Harp, D., Bachmann, I., Rosas-Moreno, T. C., & Loke, J. (2010). Wave of hope: African American youth use media and engage more civically, politically than whites. *The Howard Journal of Communications*, 21, 224–246.
- Hendriks Vettehen, P., Troost, J., Boerboom, L., Steijaert, M., & Scheepers. (2017). The relationship between media content preferences and political participation in 25 European countries: The moderating role of broadband penetration and broadband access. *Communication Research*, Online first, 1-21. doi: 10.1177/0093650217701033
- Hickerson, A. A. (2013). Media use and transnational political and civic participation: a case study of Mexicans in the USA. *Global Networks-a Journal of Transnational Affairs*, 13, 143-163. doi:10.1111/glob.12003
- Hoffman, L. H. (2012). Participation or communication? An explication of political activity in the internet age. *Journal of Information Technology & Politics*, 9, 217-233. doi:10.1080/19331681.2011.650929
- Hoffman, C. P., Aeschlimann, L. S., & Lutz, C. (2014). *A digital divide in political participation: Exploring antecedents and effects of online political participation*. International Communication Association annual meeting, Seattle, Washington. Retrieved from <https://www.alexandria.unisg.ch/229452/>
- Hoffman, L. H., & Appiah, O. (2008). Assessing cultural and contextual components of social capital: Is civic engagement in peril? *The Howard Journal of Communications*, 19, 334-354
- Hopke, J. E., Gabay, I., Kim, S. C., & Rojas, H. (2016). Mobile phones and political participation in Colombia: Mobile Twitter versus mobile Facebook. *Communication and the Public*, 1, 159-173. doi:10.1177/2057047316642607

- Huang, M. H., Whang, T., & Lei, X. C. (2017). The Internet, Social Capital, and Civic Engagement in Asia. *Social Indicators Research*, 132, 559-578. doi: 10.1007/s11205-016-1319-0
- Hwang, H., Schmierbach, M., Paek, H., Gil de Zuniga, H., & Shah, D. (2006). Media dissociation, internet use, and antiwar political participation: A case study of political dissent and action against the war in Iraq. *Mass Communication & Society*, 9, 461-483. doi: 10.1207/s15327825mcs0904\_5
- Hyun, K. D., Kim, J., & Sun, S. (2014). News use, nationalism, and internet use motivations as predictors of anti-Japanese political actions in China. *Asian Journal of Communication*, 24, 589–604. doi:10.1080/01292986.2014.944922
- Hyun, K. D., & Kim, J. (2015). Differential and interactive influences on political participation by different types of news activities and political conversation through social media. *Computers in Human Behavior*, 45, 328-334. doi:10.1016/j.chb.2014.12.031
- Ingrams, A. (2015). Mobile phones, smartphones, and the transformation of civic behavior through mobile information and connectivity. *Government Information Quarterly*, 32, 506-515. doi:10.1016/j.giq.2015.07.007
- Jensen, M. J., Danziger, J. N., & Venkatesh, A. (2007). Civil society and cyber society: The role of the internet in community associations and democratic politics. *Information Society*, 23, 39-50. doi:10.1080/01972240601057528
- Jensen, M. J. & Venkatesh, A. (2007). *Government websites and political engagement: Facilitating citizen entry into the policy process*. Retrieved September 26, 2016 from: <https://cloudfront.escholarship.org/dist/prd/content/qt39f8f9sw/qt39f8f9sw.pdf>



- Johnson, T. J., Kaye, B. K., & Kim, D. (2010). Creating a web of trust and change: Testing the Gamson hypothesis on politically interested internet users. *Atlantic Journal of Communication*, 18, 259-279.
- Jung, N., Kim, Y., & Gil de Zúñiga, H. (2011). The mediating role of knowledge and efficacy in the effects of communication on political participation. *Mass Communication & Society*, 14, 407-430. doi:10.1080/15205436.2010.496135
- Kahne, J., & Bowyer, B. (2018). The political significance of social media activity and social networks. *Political Communication*, Online first. doi: 10.1080/10584609.2018.1426662
- Kahne, J., Lee, N., & Feezell, J. T. (2013). The civic and political significance of online participatory cultures among youth transitioning to adulthood. *Journal of Information Technology & Politics*, 10, 1-20. doi: 10.1080/19331681.2012.701109
- Kamiloğlu, F., & Erdoğan, E. (2014) Effects of social media on civil and political participation and a field of survey over on Facebook. *Online Journal of Communication and Media Technologies*, 4, 47-77. Retrieved March 9, 2016 from <http://www.ojcmnt.net/articles/43/433.pdf>
- Katz, J. E., & Rice, R. E. (2002). *Social consequences of Internet use: Access, involvement, and interaction*. Cambridge, MA: MIT Press.
- Kelm, O. & Dohle, M. (2017). Information, communication and political consumerism: How (online) information and (online) communication influence boycotts and buycotts. *New Media & Society*, Online First, 1-20.
- Kenski, K., & Stroud, N. J. (2006). Connections between Internet use and political efficacy, knowledge, and participation. *Journal of Broadcasting & Electronic Media*, 50, 173-192. doi: 10.1207/s15506878jobem5002\_1

- Kim, E. (2015). A comparative study on social media use and public participation in Korea and the United States: Does social media matter? *Korean Journal of Policy Studies*, 30, 207-230.
- Kim, M. (2016). Facebook's spiral of silence and participation: The role of political expression on Facebook and partisan strength in political participation. *Cyberpsychology Behavior and Social Networking*, 19, 696-702. doi:10.1089/cyber.2016.0137
- Kim, Y., & Amna, E. (2015). Internet use and political engagement in youth. In Coleman, Stephen, and Freelon, Deen, (eds.) *Handbook of Digital Politics*. Cheltenham, GB: Edward Elgar Publishing, 2015. ProQuest ebrary. Web. 17 March 2017.
- Kim, Y., & Chen, H. T. (2015). Discussion network heterogeneity matters: Examining a moderated mediation model of social media use and civic engagement. *International Journal of Communication*, 9, 2344-2365.
- Kim, Y., Chen, H., & Gil de Zúñiga, H. (2013). Stumbling upon news on the internet: Effects of incidental news exposure and relative entertainment use on political engagement. *Computers in Human Behavior*, 29, 2607-2614. doi:10.1016/j.chb.2013.06.005
- Kim, Y., Hsu, S., & Gil de Zúñiga, H. (2013). Influence of social media use on discussion network heterogeneity and civic engagement: The moderating role of personality traits. *Journal of Communication*, 63, 498-516. doi:10.1111/jcom.12034
- Kim, Y., & Khang, H. (2014). Revisiting civic voluntarism predictors of college students' political participation in the context of social media. *Computers in Human Behavior*, 36, 114-121. doi:10.1016/j.chb.2014.03.044
- Kim, Y., Russo, S., & Amnå, E. (2016). The longitudinal relation between online and offline political participation at two different developmental stages. *New Media & Society*,

Online first, 1-19.

- Kroh, M., & Neiss, H. (2012). On the causal nature of the relationship between Internet access and political engagement. In E. Anduiza, M. Jensen & L. Jorba (Eds.), *Digital media and political engagement worldwide* (pp. 160-176). New York.
- Kümpel, A. S. & Karnowski, V. (2015). *(Social) media use and news: News usage patterns and their effects on political participatory behavior*. Paper presented at the annual meeting of the Association of Internet Researchers, Phoenix, Arizona. Retrieved from <https://spir.aoir.org/index.php/spir/article/view/1113/767>
- Kwak, N., Poor, N., & Skoric, M. M. (2006). Honey, I shrunk the world! The relation between Internet use and international engagement. *Mass Communication & Society*, 9, 189-213. doi: 10.1207/s15327825mcs0902\_4
- Kwak, N., Skoric, M. M., Williams, A. E., & Poor, N. D. (2004). To broadband or not to broadband: The relationship between high-speed internet and knowledge and participation. *Journal of Broadcasting & Electronic Media*, 48, 421-445. doi:10.1207/s15506878jobem4803\_5
- Lai, C. H. (2014). A multimodal view of voluntary associations. *Information Communication & Society*, 17, 1017-1033. doi:10.1080/1369118x.2013.877055
- Lee, S. H. (2016). Digital democracy in Asia: The impact of the Asian internet on political participation. *Journal of Information Technology & Politics*. Online first, 1-21. doi: 10.1080/19331681.2016.1214095
- Lee, F. L. F., & Chan, J. M. (2016). Digital media activities and mode of participation in a protest campaign: a study of the Umbrella Movement. *Information Communication & Society*, 19, 4-22. doi: 10.1080/1369118x.2015.1093530

- Lee, F. L. F., Chen, H. T., & Chan, M. (2017). Social media use and university students' participation in a large-scale protest campaign: The case of Hong Kong's Umbrella Movement. *Telematics and Informatics*, 34, 457-469. doi: 10.1016/j.tele.2016.08.005
- Lee, H., Kwak, N., Campbell, S. W., & Ling, R. (2014). Mobile communication and political participation in South Korea: Examining the intersections between informational and relational uses. *Computers in Human Behavior*, 38, 85-92. doi:10.1016/j.chb.2014.05.017
- Lee, N. J., Shah, D. V., & McLeod, J. M. (2013). Processes of political socialization: A communication mediation approach to youth civic engagement. *Communication Research*, 40, 669-697. doi:10.1177/0093650212436712
- Lenzi, M., Vieno, A., Altoè, G., Scacchi, L., Perkins, D. D., Zukauskienė, R., & Santinello, M. (2015). Can Facebook informational use foster adolescent civic engagement? *American Journal of Community Psychology*, 55, 444-454. doi: 10.1007/s10464-015-9723-1
- Leung, D. K. K., & Lee, F. L. F. (2014). Cultivating an active online counterpublic: Examining usage and political impact of internet alternative media. *International Journal of Press-Politics*, 19, 340-359. doi:10.1177/1940161214530787
- Leyva, R. (2016). Exploring UK Millennials' social media consumption patterns and participation in elections, activism, and "slacktivism". *Social Science Computer Review*, Online first. doi:10.1177/0894439316655738
- Li, X. Q., & Chan, M. (2017). Comparing social media use, discussion, political trust and political engagement among university students in China and Hong Kong: an application of the O-S-R-O-R model. *Asian Journal of Communication*, 27, 65-81. doi:10.1080/01292986.2016.1248454
- Lilleker, D. G., & Koc-Michalska, K. (2017). What drives political participation? Motivations

and mobilization in a digital age. *Political Communication*, 34, 21-43.

doi:10.1080/10584609.2016.1225235

Lin, J. H. (2016). Differential gains in SNSs: effects of active vs. passive Facebook political participation on offline political participation and voting behavior among first-time and experienced voters. *Asian Journal of Communication*, 26, 278-297.

doi:10.1080/01292986.2016.1148184

Livingstone, S., & Markham, T. (2008). The contribution of media consumption to civic participation. *British Journal of Sociology*, 59, 351-371. doi:10.1111/j.1468-

4446.2008.00197.x

Lu, Y., Heatherly, K. A., & Lee, J. K. (2016). Cross-cutting exposure on social networking sites:

The effects of SNS discussion disagreement on political participation. *Computers in Human Behavior*, 59, 74-81. doi:10.1016/j.chb.2016.01.030

Macafee, T., & De Simone, J. J. (2012). Killing the bill online? Pathways to young people's protest engagement via social media. *Cyberpsychology, Behavior, And Social*

*Networking*, 15, 579-584. doi:10.1089/cyber.2012.0153

Martin, J. A. (2015). Mobile news use and participation in elections: A bridge for the democratic divide? *Mobile Media & Communication*, 1-20.

doi: 10.1177/2050157914550664

Martin, J. A. (2016). Digital platforms and differential gains: Campaign news, online expression, and political participation. *Electronic News*, 10, 243-259.

McCluskey, M. R., Deshpande, S., Shah, D. V., & McLeod, D. M. (2004). The efficacy gap and political participation: When political influence fails to meet expectations. *International Journal of Public Opinion Research*, 16, 437-455. doi:10.1093/ijpor/edh038

- McGregor, S. C., & Mourao, R. R. (2017). Second screening Donald Trump: Conditional indirect effects on political participation. *Journal of Broadcasting & Electronic Media*, 61, 264-290. doi: 10.1080/08838151.2017.1309418
- Mesch, G. S., & Talmud, I. (2010). Internet connectivity, community participation, and place attachment: A longitudinal study. *American Behavioral Scientist*, 53, 1095-1110. doi: 10.1177/0002764209356243
- Middaugh, E., & Kahne, J. (2011). Youth Internet Use and Recruitment into Civic and Political Participation. *DMLcentral Working Papers*. Retrieved May 3, 2017 from <https://dmlhub.net/publications/youth-internet-use-and-recruitment-into-civic-and-political-participation/>
- Milosevic-Dordevic, J. S., & Zezel, I. L. (2017). Civic activism online: Making young people dormant or more active in real life? *Computers in Human Behavior*, 70, 113-118. doi: 10.1016/j.chb.2016.12.070
- Molyneux, L., Vasudevan, K., & de Zuniga, H. G. (2015). Gaming social capital: Exploring civic value in multiplayer video games. *Journal of Computer-Mediated Communication*, 20, 381-399. doi:10.1111/jcc4.12123
- Morris, D. S., & Morris, J. S. (2013). Digital inequality and participation in the political process: Real or imagined? *Social Science Computer Review*, 31, 589-600. doi: 10.1177/0894439313489259
- Moy, P., Manosevitch, E., Stamm, K., & Dunsmore, K. (2005). Linking dimensions of internet use and civic engagement. *Journalism & Mass Communication Quarterly*, 82, 571-586.
- Nah, S., Namkoong, K., Chen, N. T. N., & Hustedde, R. J. (2016). A communicative approach to community development: The effect of neighborhood storytelling network on civic

- participation. *Community Development* 47, 11-28.
- doi: 10.1080/15575330.2015.1094497
- Nah, S., Veenstra, A. S., & Shah, D. V. (2006). The internet and anti-war activism: A case study of information, expression, and action. *Journal of Computer-Mediated Communication*, 12, 230-247.
- Nam, T. (2012). Dual effects of the internet on political activism: Reinforcing and mobilizing. *Government Information Quarterly*, 29, S90-S97. doi:10.1016/j.giq.2011.08.010
- Nisbet, M. C., & Scheufele, D. A. (2004). Political talk as a catalyst for online citizenship. *Journalism & Mass Communication Quarterly*, 81, 877-896.
- Norris, P. (2000). *A virtuous circle: political communications in postindustrial societies*. Cambridge, UK; New York, NY, USA: Cambridge University Press.
- Norris, P. (2002, May). *Tuned out voters? Media impact on campaign learning*. Paper presented at Politeia Conference, Brussels. Retrieved from [https://wcfia.harvard.edu/files/wcfia/files/816\\_tuned\\_out.pdf](https://wcfia.harvard.edu/files/wcfia/files/816_tuned_out.pdf)
- Norris, P., & Jones, David. (1998). Virtual Democracy. *Harvard International Journal of Press/Politics*, 3, 1-4. doi: 10.1177/1081180X98003002001
- Ognyanova, K., Chen, N. T. N., Ball-Rokeach, S., An, Z., Son, M., Parks, M., & Gerson, D. (2013). Online participation in a community context: Civic engagement and connections to local communication resources. *International Journal of Communication*, 7, 2433-2456.
- Ostman, J. (2012). Information, expression, participation: How involvement in user-generated content relates to democratic engagement among young people. *New Media & Society*, 14, 1004-1021. doi:10.1177/1461444812438212

- Ostman, J. (2014). The influence of media use on environmental engagement: A political socialization approach. *Environmental Communication-a Journal of Nature and Culture*, 8, 92-109. doi:10.1080/17524032.2013.846271
- Pan, Z., Jing, G., Liu, Y., Yan., W., & Zheng, J. (2012, June). *Digital divide and internet use in China: Can the internet facilitate citizenship engagement?* Paper presented at World Association for Public Opinion Research (WAPOR) 65<sup>th</sup> Annual Conference. Retrieved from <https://wapor2012.hkpop.hk/doc/papers/ConcurrentSessionsIV/IVE/IVE-2.pdf>
- Park, C. S. (2015). Pathways to expressive and collective participation: Usage patterns, political efficacy, and political participation in social networking sites. *Journal of Broadcasting & Electronic Media*, 59, 698-716. doi:10.1080/08838151.2015.1093480
- Park, C. S. (2017). Unpacking the relationship between mobile phone usage patterns, network size, and civic engagement. *Online Journal of Communication and Media Technologies*, 7, 169-197.
- Park, C. S., & Kaye, B. K. (2017). The tweet goes on: Interconnection of twitter opinion leadership, network size, and civic engagement. *Computers in Human Behavior*, 69, 174-180. doi:10.1016/j.chb.2016.12.021
- Park, K., & You, S. (2015). Media use preference: The mediating role of communication on political engagement. *Journal of Pacific Rim Psychology*, 9, 97-107. doi: 10.1017/prp.2015.8
- Pasek, J., Kenski, K., Romer, D., & Jamieson, K. H. (2006). America's youth and community engagement - How use of mass media is related to civic activity and political awareness in 14- to 22-year-olds. *Communication Research*, 33, 115-135. doi:10.1177/0093650206287073



- Pasek, J., More, E., & Romer, D. (2009). Realizing the social internet? Online social networking meets offline civic engagement. *Journal of Information Technology & Politics*, 6, 197-215. doi:10.1080/19331680902996403
- Pearce, K. E., Freelon, D., & Kendzior, S. (2014). The effect of the internet on civic engagement under authoritarianism: The case of Azerbaijan. *First Monday*, 19, 1-20. Retrieved April 6, 2017 from <http://128.248.156.56/ojs/index.php/fm/article/view/5000/4092>
- Ponder, J. D., & Haridakis, P. (2015). Selectively social politics: The differing roles of media use on political discussion. *Mass Communication and Society*, 18, 281-302. doi:10.1080/15205436.2014.940977
- Portney, K. E., Eichenberg, R. C., & Niemi, R. G. (2009). *Gender differences in political and civic engagement among young people*. Paper presented at the American Political Science Association, Toronto. Retrieved October 3, 2016 from [https://papers.ssrn.com/sol3/papers2.cfm?abstract\\_id=1451262](https://papers.ssrn.com/sol3/papers2.cfm?abstract_id=1451262)
- Purdy, S. J. (2013). *The Internet and Mass Society: Civic Engagement in the Digital Age*. (Master's theses, Western Michigan University). Retrieved October 19, 2016 from [https://scholarworks.wmich.edu/cgi/viewcontent.cgi?article=1158&context=masters\\_theses](https://scholarworks.wmich.edu/cgi/viewcontent.cgi?article=1158&context=masters_theses)
- Quan-Haase, A., Wellman, B., Witte, J. C., & Hampton, K. N. (2002). Capitalizing on the net: Social contact, civic engagement, and sense of community. In B. Wellman & C. Haythornthwaite (Eds.), *The Internet in everyday life* (pp. 291-324). Oxford, UK: Blackwell.

- Quintelier, E., & Vissers, S. (2008). The effect of internet use on political participation: An analysis of survey results for 16-year-olds in Belgium. *Social Science Computer Review*, 26, 411-427. doi:10.1177/0894439307312631
- Razeghi, N., & Taghavi, S. Z. (2015). The internet use and community involvement in Tehran Iran. *International Journal of New Technology and Research (IJNTR)*, 1, 29-34.
- Reichart, R. & Print, M. (2016). Mediated and moderated effects of political communication on civic participation. *Information, Communication & Society*, 20, 1162-1184.  
doi: 10.1080/1369118X.2016.1218524
- Rice, L. L., Moffett, K. W., & Madupalli, R. (2013). Campaign-related social networking and the political participation of college students. *Social Science Computer Review*, 31, 257-279.  
doi:10.1177/0894439312455474
- Rienstra, T. (2015). *Social network sites in Dutch society: The effect of Facebook use on political knowledge and engagement*. (Master's thesis). Retrieved May 3, 2016 from  
<https://openaccess.leidenuniv.nl/bitstream/handle/1887/35374/Rienstra%2c%20Tjeerd-s1120107-MA%20Thesis%20PS-2015.pdf?sequence=1>
- Rojas, H., & Puig-i-Abril, E. (2009). Mobilizers mobilized: Information, expression, mobilization and participation in the digital age. *Journal of Computer-Mediated Communication*, 14, 902-927. doi:10.1111/j.1083-6101.2009.01475.x
- Rojas, H., Barnidge, M., & Abril, E.P. (2016). Egocentric publics and corrective action. *Communication and the Public*, 1, 27-38. doi: 10.1177/2057047315619421
- Romer, D., Jamieson, K. H., & Pasek, J. (2009). Building social capital in young people: The role of mass media and life outlook. *Political Communication*, 26, 65-83.  
doi:10.1080/10584600802622878

- Rusciano, F. L. (2014). "Surfing Alone": The relationships among internet communities, public opinion, anomie, and civic participation. *Studies in Sociology of Science*, 5, 26-33.  
doi: 10.3968/4713
- Saldana, M., McGregor, S. C., & Gil de Zúñiga, H. (2015). Social media as a public space for politics: Cross-national comparison of news consumption and participatory behaviors in the United States and the United Kingdom. *International Journal of Communication*, 9, 3304–3326. Retrieved from <http://ijoc.org/index.php/ijoc/article/view/3238/1485>
- Scheufele, D. A., & Nisbet, M. C. (2002). Being a citizen online - New opportunities and dead ends. *Harvard International Journal of Press-Politics*, 7, 55-75.
- Shah, D. V., Cho, J., Eveland, W. P., & Kwak, N. (2005). Information and expression in a digital age - Modeling Internet effects on civic participation. *Communication Research*, 32, 531-565. doi: 10.1177/0093650505279209
- Shah, D. V., Cho, J., Nah, S., Gotlieb, M. R., Hwang, H., Lee, N. J., . . . McLeod, D. M. (2007a). Campaign ads, online messaging, and participation: Extending the communication mediation model. *Journal of Communication*, 57, 676-703. doi:10.1111/j.1460-2466.2007.00363.x
- Shah, D. V., Kwak, N., & Holbert, R. L. (2001a). "Connecting" and "disconnecting" with civic life: Patterns of internet use and the production of social capital. *Political Communication*, 18, 141-162. doi:10.1080/105846001750322952
- Shah, D. V., McLeod, D. M., Kim, E., Lee, S. Y., Gotlieb, M. R., Ho, S. S., & Brevik, H. (2007b). Political consumerism: How communication and consumption orientations drive "lifestyle politics". *Annals of the American Academy of Political and Social Science*, 611, 217-235. doi:10.1177/0002716206298714

- Shah, D. V., McLeod, J. M., & Lee, N. (2009). Communication competence as a foundation for civic competence: Processes of socialization into citizenship. *Political Communication*, 26, 102-117. doi: 10.1080/10584600802710384
- Shah, D. V., McLeod, J. M., & Yoon, S. H. (2001b). Communication, context, and community - An exploration of print, broadcast, and internet influences. *Communication Research*, 28, 464-506. doi:10.1177/009365001028004005
- Shah, D. V., & Scheufele, D. A. (2006). Explicating opinion leadership: Nonpolitical dispositions, information consumption, and civic participation. *Political Communication*, 23, 1-22. doi:10.1080/10584600500476932
- Shah, D., Schmierbach, M., Hawkins, J., Espino, R., & Donovan, J. (2002). Nonrecursive models of Internet use and community engagement: Questioning whether time spent online erodes social capital. *Journalism & Mass Communication Quarterly*, 79, 964-987. doi: 10.1177/107769900207900412
- Shehata, A., Ekstrom, M., & Olsson, T. (2016). Developing self-actualizing and dutiful citizens: Testing the AC-DC model using panel data among adolescents. *Communication Research*, 43, 1141-1169. doi: 10.1177/0093650215619988
- Skoric, M. (2015). Social media and youth participation in Singapore. In H. Gil de Zúñiga (Ed.), *New Technologies and Civic Engagement New Agendas in Communication* (59-77). New York: Routledge.
- Song, K., Lew, S., & Kim, H. (no date). *Does SNS make gender differences in political participation? South Korean case study*. Retrieved June 17, 2016 from [http://www.academia.edu/22974490/Does\\_SNS\\_make\\_Gender\\_Differences\\_in\\_Political\\_Participation\\_South\\_Korean\\_Case\\_Study](http://www.academia.edu/22974490/Does_SNS_make_Gender_Differences_in_Political_Participation_South_Korean_Case_Study)

Stark, A. L. (2009). *A study of internet use and its impact on individual level social capital indicators and motivation to volunteer*. (Master's Thesis, University of Missouri).

Retrieved from

Stern, M. J., Adams, A. E., & Boase, J. (2011). Rural community participation, social networks, and broadband use: Examples from localized and national survey data. *Agriculture and Resource Economics Review*, 40, 158-171.

Tang, G., & Lee, F. L. F. (2013). Facebook use and political participation: the impact of exposure to shared political information, connections with public political actors, and network structural heterogeneity. *Social Science Computer Review*, 31, 763-773.  
doi:10.1177/0894439313490625

Theocharis, Y. (2011a). Young people, political participation and online postmaterialism in Greece. *New Media & Society*, 13, 203-223. doi: 10.1177/1461444810370733

Theocharis, Y. (2011b). The influence of postmaterialist orientations on young British people's offline and online political participation. *Representation*, 47, 435-455.  
doi: 10.1080/00344893.2011.611160

Theocharis, Y., & Quintelier, E. (2016). Stimulating citizenship or expanding entertainment? The effect of Facebook on adolescent participation. *New Media & Society*, 18, 817-836.  
doi:10.1177/1461444814549006

Towner, T. (2013). All political participation is socially networked?: New media and the 2012 election. *Social Science Computer Review*, 31, 527-541. doi:10.1177/0894439313489656

Towner, T. L., & Muñoz, C. L. (2016). Baby boom or bust?: The new media effect on political participation. *Journal of Political Marketing, Online First*.  
doi:10.1080/15377857.2016.1153561

- Vaccari, C., Valeriani, A., Barbera, P., Bonneau, R., Jost, J. T., Nagler, J., & Tucker, J. A. (2015). Political expression and action on social media: Exploring the relationship between lower and higher-threshold political activities among Twitter users in Italy. *Journal of Computer-Mediated Communication*, 20, 221-239. doi:10.1111/jcc4.12108
- Valenzuela, S. (2013). Unpacking the use of social media for protest behavior: The roles of information, opinion expression, and activism. *American Behavioral Scientist*, 57, 920-942. doi:10.1177/0002764213479375
- Valenzuela, S., Kim, Y., & Gil de Zúñiga, H. (2012). Social networks that matter: Exploring the role of political discussion for online political participation. *International Journal of Public Opinion Research*, 24, 163-184.
- Valenzuela, S., Park, N., & Kee, K. F. (2009). Is there social capital in a social network site?: Facebook use and college students' life satisfaction, trust, and participation. *Journal of Computer-Mediated Communication*, 14, 875-901. doi: 10.1111/j.1083-6101.2009.01474.x
- Vesnic-Alujevic, L. (2012). Political participation and web 2.0 in Europe: A case study of Facebook. *Public Relations Review*, 38, 466-470. doi: 10.1016/j.pubrev.2012.01.010
- Vissers, S., & Stolle, D. (2014). Spill-over effects between Facebook and on/offline political participation? Evidence from a two-wave panel study. *Journal of Information, Technology & Politics*, 11, 258-275. doi: 10.1080/19331681.2014.888383
- Vraga, E. (2016). Party differences in political content on social media. *Online Information Review*, 40, 595-609. doi:10.1108/OIR-10-2015-0345

- Vromen, A. (2007). Australian young people's participatory practices and internet use. In B. D. Loader (Ed.), *Young citizens in the digital age: Political Engagement, young people and new media* (97-113). New York: Routledge.
- Walgrave, S., Bennett, W. L., Van Laer, J., & Breunig, C. (2011). Multiple engagements and network bridging in contentious politics: digital media use of protest participants. *Mobilization, 16*, 325-349.
- Wang, M., Gabay, I., & Shah, D. V. (2012). The civic consequences of "going negative": Attack ads and adolescents' knowledge, consumption, and participation. *The Annals of the American Academy of Political and Social Science, 644*, 256-271.  
doi:10.1177/0002716212454652
- Ward, J., & de Vreese, C. (2011). Political consumerism, young citizens and the Internet. *Media, Culture & Society, 33*, 399-413. doi: 10.1177/0163443710394900
- Warren, R., & Wicks, R. H. (2011). Political socialization: modeling teen political and civic engagement. *Journalism & Mass Communication Quarterly, 88*, 156-175.
- Weber, L. M., Loumakis, A., & Bergman, J. (2003). Who Participates and Why? An Analysis of Citizens on the Internet and the Mass Public. *Social Science Computer Review, 21*, 26-42.  
doi: 10.1177/0894439302238969
- Wei, L. (2007). The political effects of the digital divide. (Dissertation, Washington State University). Retrieved from  
[https://www.researchgate.net/publication/265073759\\_THE\\_POLITICAL\\_EFFECTS\\_OF\\_THE\\_DIGITAL\\_DIVIDE](https://www.researchgate.net/publication/265073759_THE_POLITICAL_EFFECTS_OF_THE_DIGITAL_DIVIDE)

- Wellman, B., Haase, A. Q., Witte, J., & Hampton, K. (2001). Does the internet increase, decrease, or supplement social capital? Social networks, participation, and community commitment. *American Behavioral Scientist*, 45, 436-455.
- Wells, C., & Thorson, K. (2017). Combining big data and survey techniques to model effects of political content flows in Facebook. *Social Science Computer Review*, 35, 33-52.  
doi:10.1177/0894439315609528
- Wells, C., Cramer, K. J., Wagner, M. W., Alvarez, G., Friedland, L. A., Shah, D. V., . . . Franklin, C. (2017). When we stop talking politics: The maintenance and closing of conversation in contentious times. *Journal of Communication*, 67, 131-157. doi: 10.1111/jcom.12280
- Wen, N., Hao, X. & George, C. (2013). Gender and political participation: News consumption, political efficacy and interpersonal communication. *Asian Journal for Women's Studies*, 19, 124-149. doi:10.1080/12259276.2013.11666168
- Wicks, R. H., LeBlanc, W. J., Morimoto, S. A., Maxwell, A., & Schulte, S. R. (2014). Correlates of political and civic engagement among youth during the 2012 presidential campaign. *American Behavioral Scientist*, 58, 622–644. doi:10.1177/0002764213515226
- Wilderman, L. (2012). *Twitter: Catalyst or passing fad? The influence of Twitter use on young adults' political participation*. (Master's thesis). Retrieved May 3, 2016 from <http://www.scriptiesonline.uba.uva.nl/413515>
- Willnat, L., Wong, W. J., Tamam, E., & Aw, A. (2013). Online media and political participation: The case of Malaysia. *Mass Communication and Society*, 16, 557-585.  
doi:10.1080/15205436.2012.734891



- Wolfsfeld, G., Yarchi, M., & Samuel-Azran, T. (2016). Political information repertoires and political participation. *New Media & Society*, 18, 2096-2115.  
doi:10.1177/1461444815580413
- Xenos, M., & Moy, P. (2007). Direct and differential effects of the Internet on political and civic engagement. *Journal of Communication*, 57, 704-718. doi: 10.1111/j.1460-2466.2007.00364.x
- Xie, W. J. (2014). Social network site use, mobile personal talk and social capital among teenagers. *Computers in Human Behavior*, 41, 228-235. doi:10.1016/j.chb.2014.09.042
- Yamamoto, M. (2010). Examining differential gains from mass media in Japan. *Keio Communication Review*, 32, 85-104.
- Yamamoto, M., Kushin, M. J., & Dalisay, F. (2015). Social media and mobiles as political mobilization forces for young adults: Examining the moderating role of online political expression in political participation. *New Media & Society*, 17, 880-898.  
doi:10.1177/1461444813518390
- Ye, Y. J., Xu, P., & Zhang, M. X. (2017). Social media, public discourse and civic engagement in modern China. *Telematics and Informatics*, 34, 705-714. doi: 10.1016/j.tele.2016.05.021
- Yoo, S. W., & Gil De Zúñiga, H. (2014). Connecting blog, Twitter, and Facebook use with gaps in knowledge and participation. *Communication & Society*, 27, 33-48.  
doi:10.15581/003.27.4.33-48
- Yung, B., & Leung, L. Y. (2014). Facebook as change? Political engagement in semi-democratic Hong Kong in its transition to universal suffrage. *Journal of Asian Public Policy*, 7, 291-305. doi:10.1080/17516234.2014.922147

- Zeh, R. & Holtz-Bacha, C. (2014). Internet, Social Media Use and Political Participation in the 2013 Parliamentary Election in Germany. In Guy Lachapelle & Philippe J. Maarke (eds), *Political Parties in the Digital Age - The Impact of New Technologies in Politics*. De Gruyter.
- Zhang, W., & Gearhart, S. (2015). The effects of internet use and internet efficacy on offline and online engagement. *Online Journal of Communication and Media Technologies*, 5. Retrieved from <http://www.ojcmnt.net/articles/54/547.pdf>
- Zhang, W., Johnson, T. J., Seltzer, T., & Bichard, S. L. (2010). The revolution will be networked: The influence of social networking sites on political attitudes and behavior. *Social Science Computer Review*, 28, 75-92. doi:10.1177/0894439309335162
- Zhang, W., Seltzer, T., & Bichard, S. L. (2013). Two sides of the coin: Assessing the influence of social network site use during the 2012 U.S. presidential campaign. *Social Science Computer Review*, 31, 542-551. doi:10.1177/0894439313489962
- Zhong, Z. J. (2011). The effects of collective MMORPG (Massively Multiplayer Online Role-Playing Games) play on gamers' online and offline social capital. *Computers in Human Behavior*, 27, 2352-2363. doi:10.1016/j.chb.2011.07.014
- Zhong, Z. J. (2014). Civic engagement among educated Chinese youth: The role of SNS (social networking services), bonding and bridging social capital. *Computers & Education*, 75, 263-273. doi:10.1016/j.compedu.2014.03.005
- Zhong, Z. J. and Zhang, X. (2017). A mediation path to Chinese netizens' civic engagement: The effects of news usage, civic motivations, online expression, and discussion. *China: An International Journal*, 15, 22-43.

- Zhou, Y. (2009). *The role of communication in political participation: Exploring the social normative and cognitive processes related to political behaviors*. (Master's Thesis, Washington State University). Retrieved from <http://citeseerx.ist.psu.edu/viewdoc/download?doi=10.1.1.427.4993&rep=rep1&type=pdf>
- Zhu, Q. F., Skoric, M., & Shen, F. (2017). I shield myself from thee: Selective avoidance on social media during political protests. *Political Communication*, 34, 112-131.  
doi:10.1080/10584609.2016.1222471
